# Supplementary material for: Cross-talk between Arg methylation and Ser phosphorylation modulates apoptosis signal–regulating kinase 1 activation in endothelial cells
Source: PubMed Central journal article supplement — Mol Biol Cell. 2016 Apr 15;27(8):1358–66. doi: 10.1091/mbc.E15-10-0738 (PMC4831888; doi:10.1091/mbc.e15-10-0738), 2016-04-15
Supplement: supp_E15-10-0738v1_CombinedSupMats.pdf [file supp_E15-10-0738v1_CombinedSupMats.pdf]

# Supplemental Materials

*Molecular Biology of the Cell*

Chen et al.

Supplemental data

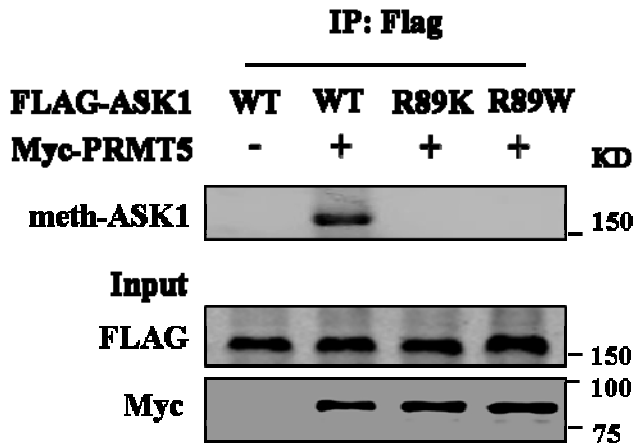

**Figure S1. PRMT5 methylates ASK1 at Arg89.** HEK293T cells were transfected for 48 h with expression vectors encoding FLAG-ASK1, mutant of ASK1(R89K, R89W), and Myc-PRMT5, as indicated. Cell lysates were then subjected to immunoprecipitated with anti-FLAG and then separated by 8% SDS-PAGE. Methylation of ASK1 was examined by immunoblot with antibody to dimethylation symmetric.
